# Supplementary material
Source: PubMed Central journal article supplement (PMC6649094)
Supplement: ao8b03655_si_001.pdf [file ao8b03655_si_001.pdf]

# Recyclable Au/SiO<sub>2</sub>-shell/Fe<sub>3</sub>O<sub>4</sub>-core catalyst for the reduction of nitro aromatic compounds in aqueous solution

Kushanava Bhaduri<sup>§1</sup>, Bidya Dhar Das<sup>§1</sup>, Rawesh Kumar<sup>2g</sup>, Sujan Mondal<sup>3</sup>, Sauvik Chatterjee<sup>3</sup>, Sneha Shah<sup>1</sup>, Juan J. Bravo-Suárez<sup>4\*</sup> and Biswajit Chowdhury<sup>1\*</sup>

1. Department of Applied Chemistry, Indian Institute of Technology (ISM), Dhanbad  
Dhanbad-826004, Jharkhand, India
2. Department of Chemistry, Sankalchand Patel University, Visnagar, Gujrat
3. Department of Materials Science, Indian Association for the Cultivation of Science,  
Kolkata-700032, India
4. Chemical and Petroleum Engineering Department & Center for Environmentally  
Beneficial Catalysis, The University of Kansas, Lawrence, KS 66045, USA

*§Author 1 and 2 have equal contribution in the work*

\*1 Corresponding Author: biswajit72@iitism.ac.in; Phone + 91-326-223-5663; (+91)-326-2296563

\*2 Corresponding Author: jjbravo@ku.edu ; Phone 785-864-8297; 785-864-1756

g Formerly at NIT Jamshedpur, Jharkhand

## Supporting Information

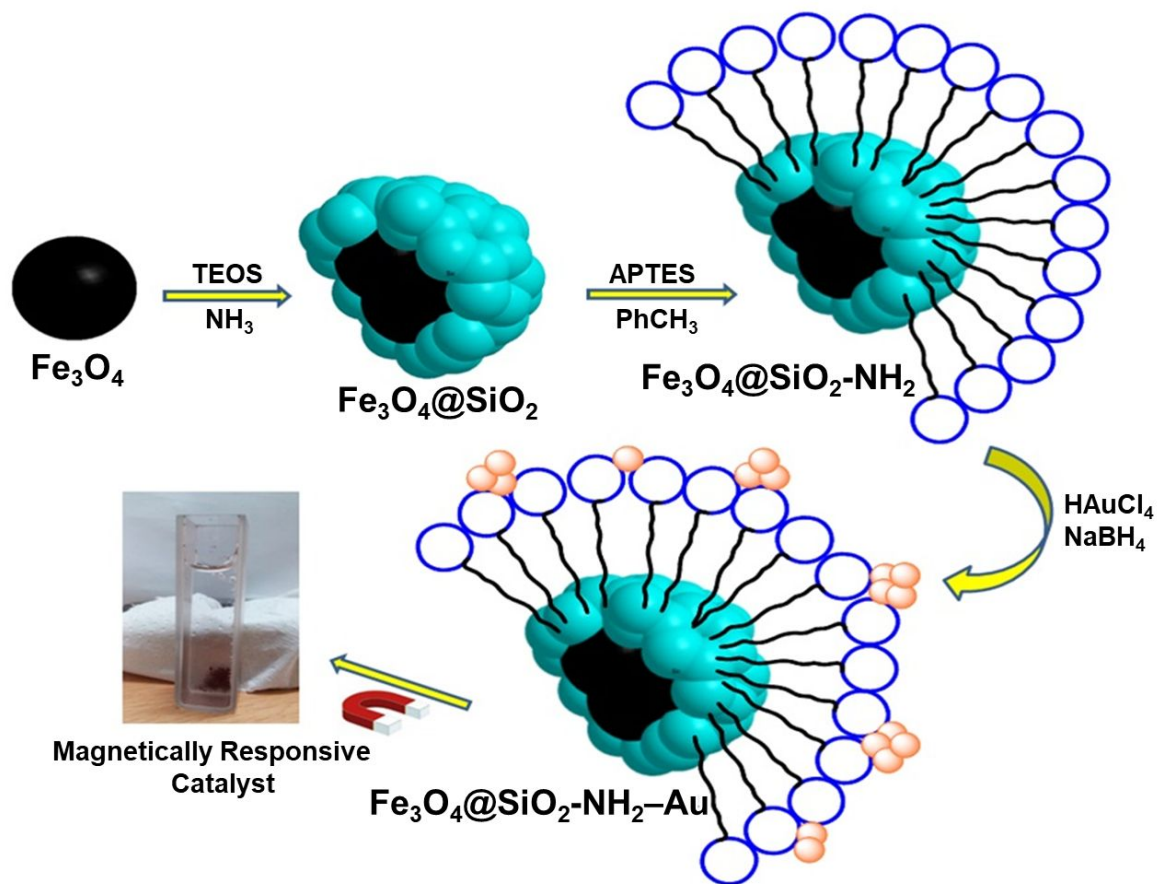

**Figure S1.** A schematic illustration of the formation of the magnetically recyclable  $\text{Fe}_3\text{O}_4@\text{SiO}_2\text{-NH}_2\text{-Au}$  microsphere.
